# Supplementary material
Source: PubMed Central journal article supplement (PMC3020769)
Supplement: supp_M110.176784_jbc.M110.176784-1.pdf [file supp_M110.176784_jbc.M110.176784-1.pdf]

Figure S1

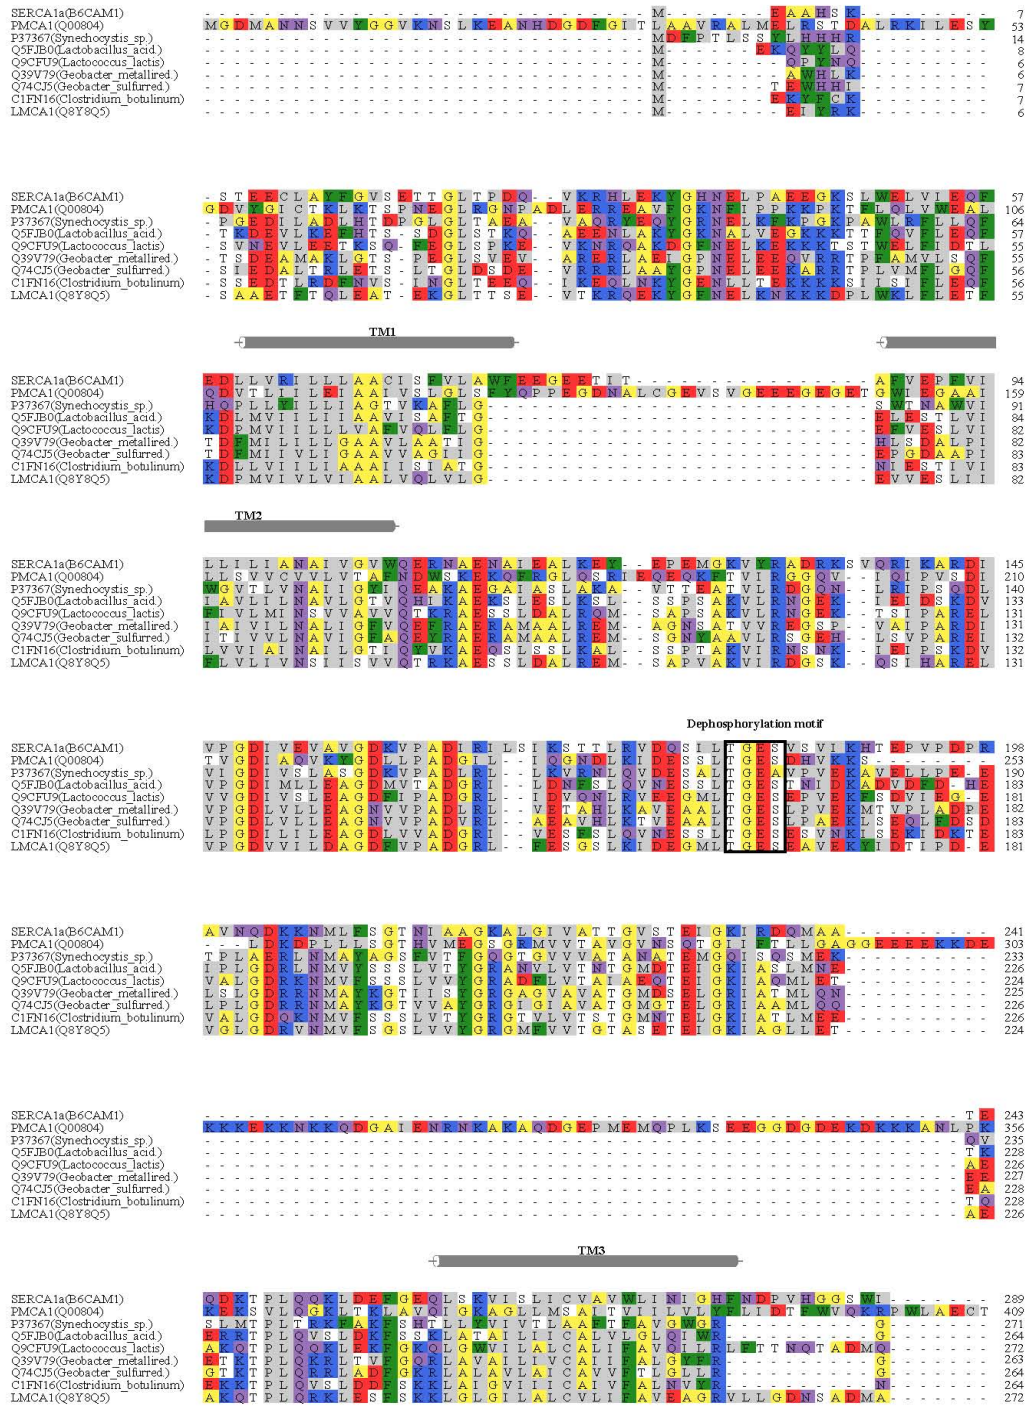

TM4  
 ↓ ↓ ↓ ↓

|                               |                                                                                                        |     |
|-------------------------------|--------------------------------------------------------------------------------------------------------|-----|
| SERCA1a(B6CAM1)               | PI I I Q V V K G I I G V T V L V V A V P E G L P A V I T T C L A L G T R R M A K K N A I V R S L P S   | 338 |
| PMCA1(Q00804)                 | PI I I Q V V K G I I G V T V L V V A V P E G L P L P V T I S L A S V N P M M K D N N L V R R H L D A   | 462 |
| P37367(Synechocystis sp.)     | PI I I Q V V K G I I G V T V L V V A V P E G L P L P V T V T L A I G V N R M M K D N N A I R K L L P A | 320 |
| Q5FB0(Lactobacillus acid)     | PI I I Q V V K G I I G V T V L V V A V P E G L P L P V T V T L A I G V N R M M K D N N A I R K L L P A | 313 |
| Q9CFU9(Lactococcus lactis)    | PI I I Q V V K G I I G V T V L V V A V P E G L P L P V T V T L A I G V N R M M K D N N A I R K L L P A | 321 |
| Q39V79(Geobacter metallire)   | PI I I Q V V K G I I G V T V L V V A V P E G L P L P V T V T L A I G V N R M M K D N N A I R K L L P A | 312 |
| Q74CJ5(Geobacter_sulfured)    | PI I I Q V V K G I I G V T V L V V A V P E G L P L P V T V T L A I G V N R M M K D N N A I R K L L P A | 313 |
| C1FN16(Clostridium_botulinum) | PI I I Q V V K G I I G V T V L V V A V P E G L P L P V T V T L A I G V N R M M K D N N A I R K L L P A | 313 |
| LMCA1(Q8Y9Q5)                 | PI I I Q V V K G I I G V T V L V V A V P E G L P L P V T V T L A I G V N R M M K D N N A I R K L L P A | 321 |

Phosphorylation Site

|                               |                                                                                                     |     |
|-------------------------------|-----------------------------------------------------------------------------------------------------|-----|
| SERCA1a(B6CAM1)               | V E T L G C T S V I C S K T G T L T T N Q M S V C K M I I K V D G D C S L N E S I T G S T V A P     | 391 |
| PMCA1(Q00804)                 | C E T M G N A T A I C S K T G T L T T M N R M A V V Q A I N E L L A V L M L N D S S L S G C G L L   | 494 |
| P37367(Synechocystis sp.)     | V E A L G S A T V V C S K T G T L T T E N Q M T V Q A V A G G L L L L L L L L L L L L L L L L L     | 364 |
| Q5FB0(Lactobacillus acid)     | V E S L G S V S V I C S K T G T L T T Q N K M T V E S T L I G G L L L L L L L L L L L L L L L L L   | 345 |
| Q9CFU9(Lactococcus lactis)    | V E T L G S T S V I C T K T G T L T T Q N K M T V S D L L L L L L L L L L L L L L L L L L L L L L   | 322 |
| Q39V79(Geobacter metallire)   | V E T L G S V T V I C S K T G T L T T L N R M T V E K V A M N G L L L L L L L L L L L L L L L L L L | 344 |
| Q74CJ5(Geobacter_sulfured)    | V E T L G S V T V I C S K T G T L T T L N R M T V E K V A M N G L L L L L L L L L L L L L L L L L L | 345 |
| C1FN16(Clostridium_botulinum) | V E T L G S V T V I C S K T G T L T T Q N K M T V S D L L L L L L L L L L L L L L L L L L L L L L   | 345 |
| LMCA1(Q8Y9Q5)                 | V E T L G S T S V I C T K T G T L T T Q N K M T V S D L L L L L L L L L L L L L L L L L L L L L L   | 353 |

|                               |                                                                                                       |     |
|-------------------------------|-------------------------------------------------------------------------------------------------------|-----|
| SERCA1a(B6CAM1)               | E G E V L K N D P I P I S S Q G D D G L V L L L L L L L L L L L L L L L L L L L L L L L L L L L L L L | 437 |
| PMCA1(Q00804)                 | K H V K K V P E P P P P N I L S L L L L L L L L L L L L L L L L L L L L L L L L L L L L L L L L L L   | 541 |
| P37367(Synechocystis sp.)     | K G E E V O V M G E E V N V L L D G L P P V L E E C I L T G M L C L L L L L L L L L L L L L L L L L L | 413 |
| Q5FB0(Lactobacillus acid)     | L V L P N Q M L E N Q L H R L L L L L L L L L L L L L L L L L L L L L L L L L L L L L L L L L L L     | 381 |
| Q9CFU9(Lactococcus lactis)    | T Q G S K E L T L T Q A Q K L L L L L L L L L L L L L L L L L L L L L L L L L L L L L L L L L L L     | 389 |
| Q39V79(Geobacter metallire)   | V I T M P L A D A C G T M G G E A G R H L L L L L L L L L L L L L L L L L L L L L L L L L L L L L L L | 384 |
| Q74CJ5(Geobacter_sulfured)    | L E G T D A G S S G V S A A T L L L L L L L L L L L L L L L L L L L L L L L L L L L L L L L L L L L   | 381 |
| C1FN16(Clostridium_botulinum) | K L I T S E P I L N M S L S K R L L L L L L L L L L L L L L L L L L L L L L L L L L L L L L L L L L   | 381 |
| LMCA1(Q8Y9Q5)                 | G T E N P E S P E N S G E R R L L L L L L L L L L L L L L L L L L L L L L L L L L L L L L L L L L     | 392 |

|                               |                                                                                                             |     |
|-------------------------------|-------------------------------------------------------------------------------------------------------------|-----|
| SERCA1a(B6CAM1)               | G E A T E T A L T L V K M N V E N I T E V R N L S V E F R A N A C N S V I R Q L L L M K K E P T L E S       | 487 |
| PMCA1(Q00804)                 | G N K T E C A L L G P L L L L L L L L L L L L L L L L L L L L L L L L L L L L L L L L L L L L L L L L L     | 578 |
| P37367(Synechocystis sp.)     | G D P T E E G A L L A S L L L L L L L L L L L L L L L L L L L L L L L L L L L L L L L L L L L L L L L L L   | 447 |
| Q5FB0(Lactobacillus acid)     | G D P T E A L L L A G L L L L L L L L L L L L L L L L L L L L L L L L L L L L L L L L L L L L L L L L L     | 425 |
| Q9CFU9(Lactococcus lactis)    | G D P T V V L L A G L L L L L L L L L L L L L L L L L L L L L L L L L L L L L L L L L L L L L L L L L       | 423 |
| Q39V79(Geobacter metallire)   | G D P T E E T A L S A A L L L L L L L L L L L L L L L L L L L L L L L L L L L L L L L L L L L L L L L L L L | 418 |
| Q74CJ5(Geobacter_sulfured)    | G D P T E E T A L L A G L L L L L L L L L L L L L L L L L L L L L L L L L L L L L L L L L L L L L L L L L   | 415 |
| C1FN16(Clostridium_botulinum) | G D P T E V A L T N L L L L L L L L L L L L L L L L L L L L L L L L L L L L L L L L L L L L L L L L L       | 415 |
| LMCA1(Q8Y9Q5)                 | G D P T E V A L T A L L L L L L L L L L L L L L L L L L L L L L L L L L L L L L L L L L L L L L L L L       | 426 |

Nucleotide binding

|                               |                                                                                                             |     |
|-------------------------------|-------------------------------------------------------------------------------------------------------------|-----|
| SERCA1a(B6CAM1)               | S K D R K S M S V C S P A K S S R A A V G N K M V S G A P E G V I D R C N V R V G T T R V P M T G           | 539 |
| PMCA1(Q00804)                 | O S V R K S M S T V L K N S D G S R L L L L L L L L L L L L L L L L L L L L L L L L L L L L L L L L L L     | 626 |
| P37367(Synechocystis sp.)     | E S D R K S M S T V L K N S D G S R L L L L L L L L L L L L L L L L L L L L L L L L L L L L L L L L L L     | 490 |
| Q5FB0(Lactobacillus acid)     | S R K L M S T L H L I H T V P T L L L L L L L L L L L L L L L L L L L L L L L L L L L L L L L L L L L       | 471 |
| Q9CFU9(Lactococcus lactis)    | D S E R K L M S T L N L H G Q K T L L L L L L L L L L L L L L L L L L L L L L L L L L L L L L L L L L L     | 469 |
| Q39V79(Geobacter metallire)   | D S E R K L M T T H E R S E G V L L L L L L L L L L L L L L L L L L L L L L L L L L L L L L L L L L L       | 461 |
| Q74CJ5(Geobacter_sulfured)    | D S E R K M C M T T H L T G D T V L L L L L L L L L L L L L L L L L L L L L L L L L L L L L L L L L L L     | 458 |
| C1FN16(Clostridium_botulinum) | D S D R K L M S T L H L N I D N E V L L L L L L L L L L L L L L L L L L L L L L L L L L L L L L L L L L L   | 461 |
| LMCA1(Q8Y9Q5)                 | D S D R K L M S T L E H L T N E N K A L L L L L L L L L L L L L L L L L L L L L L L L L L L L L L L L L L L | 472 |

|                               |                                                                                                                       |     |
|-------------------------------|-----------------------------------------------------------------------------------------------------------------------|-----|
| SERCA1a(B6CAM1)               | P V K E K I L S V I K E G T G R D T L R C L A L A T F D T P P K R E E M V L D S S R M E V E T D L                     | 591 |
| PMCA1(Q00804)                 | R D R D D I V K T V I E P M A S E G L R R V L A A R T V P H H H A I E H G N L L L L L L L L L L L L L L L L L L       | 674 |
| P37367(Synechocystis sp.)     | I D R G E I E S N V E P M A Q Q G L R R V L A A R T V P H H H A I E H G N L L L L L L L L L L L L L L L L L L         | 534 |
| Q5FB0(Lactobacillus acid)     | E D K K K L A Q N E H L S E N G L R V L A A R K E K L E E D L S P F L L L L L L L L L L L L L L L L L L L L L L       | 511 |
| Q9CFU9(Lactococcus lactis)    | E L K E K L Q A Q N E A L S O K A L R V L A A R K E V S D N K T E L T L T L L L L L L L L L L L L L L L L L L L L L L | 512 |
| Q39V79(Geobacter metallire)   | P D V E K I L R L S E E M A E E G L R V L A V M R N V E O V P D R L S D R L L L L L L L L L L L L L L L L L L L L L L | 505 |
| Q74CJ5(Geobacter_sulfured)    | L D Q E I E R V T V E M A A R G L R V L A L A M R W E L P D R L S D E L L L L L L L L L L L L L L L L L L L L L L L   | 502 |
| C1FN16(Clostridium_botulinum) | K D I N D I N N M L N R L L S S N G L R V L S G E K L D D K D L S L D D L L L L L L L L L L L L L L L L L L L L L L   | 503 |
| LMCA1(Q8Y9Q5)                 | E I L A K L K E T N E E L S N Q A L R V L A G E K R M P A D T T E L S L E L L L L L L L L L L L L L L L L L L L L L L | 515 |

|                               |                                                                                                                       |     |
|-------------------------------|-----------------------------------------------------------------------------------------------------------------------|-----|
| SERCA1a(B6CAM1)               | T V G V V G M L D P P K E V M G S I Q L C R D A G I R V I M I T G D N R K G T A I A I C R R I G I G E                 | 644 |
| PMCA1(Q00804)                 | R D R D D I V K T V I E P M A S E G L R R V L A A R T V P H H H A I E H G N L L L L L L L L L L L L L L L L L L       | 727 |
| P37367(Synechocystis sp.)     | I D R G E I E S N V E P M A Q Q G L R R V L A A R T V P H H H A I E H G N L L L L L L L L L L L L L L L L L L         | 587 |
| Q5FB0(Lactobacillus acid)     | E D K K K L A Q N E H L S E N G L R V L A A R K E K L E E D L S P F L L L L L L L L L L L L L L L L L L L L L L       | 564 |
| Q9CFU9(Lactococcus lactis)    | E L K E K L Q A Q N E A L S O K A L R V L A A R K E V S D N K T E L T L T L L L L L L L L L L L L L L L L L L L L L L | 565 |
| Q39V79(Geobacter metallire)   | P D V E K I L R L S E E M A E E G L R V L A V M R N V E O V P D R L S D R L L L L L L L L L L L L L L L L L L L L L L | 558 |
| Q74CJ5(Geobacter_sulfured)    | L D Q E I E R V T V E M A A R G L R V L A L A M R W E L P D R L S D E L L L L L L L L L L L L L L L L L L L L L L L   | 555 |
| C1FN16(Clostridium_botulinum) | K D I N D I N N M L N R L L S S N G L R V L S G E K L D D K D L S L D D L L L L L L L L L L L L L L L L L L L L L L   | 556 |
| LMCA1(Q8Y9Q5)                 | E I L A K L K E T N E E L S N Q A L R V L A G E K R M P A D T T E L S L E L L L L L L L L L L L L L L L L L L L L L L | 568 |

|                               |                                                                                                           |     |
|-------------------------------|-----------------------------------------------------------------------------------------------------------|-----|
| SERCA1a(B6CAM1)               | N E E V A D R A T G R E F D L L P L A Q R E A C R R A C C A R V E P S H K S K I V E                       | 689 |
| PMCA1(Q00804)                 | G E E L L C L G K E F D L L P L A Q R E A C R R A C C A R V E P S H K S K I V E                           | 778 |
| P37367(Synechocystis sp.)     | G D I L L A V T G L S L L L L L L L L L L L L L L L L L L L L L L L L L L L L L L L L L L L L L L L L L   | 629 |
| Q5FB0(Lactobacillus acid)     | G D I L L A V T G L S L L L L L L L L L L L L L L L L L L L L L L L L L L L L L L L L L L L L L L L L L   | 605 |
| Q9CFU9(Lactococcus lactis)    | G D M L L A V T G L S L L L L L L L L L L L L L L L L L L L L L L L L L L L L L L L L L L L L L L L L L   | 606 |
| Q39V79(Geobacter metallire)   | E S E L L V T G R E L A L L L L L L L L L L L L L L L L L L L L L L L L L L L L L L L L L L L L L L L L L | 597 |
| Q74CJ5(Geobacter_sulfured)    | D G D A L L T G R E L A L L L L L L L L L L L L L L L L L L L L L L L L L L L L L L L L L L L L L L L L L | 599 |
| C1FN16(Clostridium_botulinum) | N D I L L A V T G L S L L L L L L L L L L L L L L L L L L L L L L L L L L L L L L L L L L L L L L L L L   | 597 |
| LMCA1(Q8Y9Q5)                 | D D I L L A V T G L S L L L L L L L L L L L L L L L L L L L L L L L L L L L L L L L L L L L L L L L L L   | 609 |



**Hinge motif**

|                               |                 |                     |                 |               |                   |                         |     |
|-------------------------------|-----------------|---------------------|-----------------|---------------|-------------------|-------------------------|-----|
| SERCA1a(B6CAM1)               | G L L - - - - - | S Q D E I T A M T   | G D G V N D A P | A L K K A F I | G I A M G - S G T | V A V T A S F M V L A   | 736 |
| PMCA1(Q00804)                 | G I I D S T V S | E Q R Q V V A V T   | G D G T N D G P | A L K K A D G | G A M G I A G T   | V A V E A S D I I L T   | 831 |
| P37367(Synechocystis sp.)     | A L - - - - -   | Q E R G H I V A M T | G D G V N D A P | A L K K A D I | G I A M G I T G T | V A V E A S S D M L L T | 677 |
| Q5FB0(Lactobacillus acid)     | A M - - - - -   | Q N R K I V S M T   | G D G V N D A P | A L K K A D I | G V A M G I T G T | V A V E A S S M I L A   | 653 |
| Q9CFU9(Lactococcus lactis)    | A M - - - - -   | Q N R E Q V T A M T | G D G V N D A P | A L K K A M I | G I A M G - S G T | V A V E A S S M I L T   | 653 |
| Q39V79(Geobacter metallire)   | A L - - - - -   | Q R G H I V A M T   | G D G V N D A P | A L K K A D I | G I A M G I T G T | V A V E A S A M I L L   | 647 |
| Q74CJ5(Geobacter_sulfured)    | A L - - - - -   | Q R G H I V A M T   | G D G V N D A P | A L K K A D I | G I A M G I T G T | V A V E A S A M V L L   | 645 |
| C1FN16(Clostridium_botulinum) | A M - - - - -   | Q S K R I V A M T   | G D G V N D A P | A L K K A D I | G I A M G I T G T | V A V E A S S M I L T   | 645 |
| LMCA1(Q8Y9Q5)                 | A M - - - - -   | Q S K R I V A M T   | G D G V N D A P | A L K K A D I | G V A M G - S G T | V A V E A S A A M I L T | 656 |

**TMS**

|                               |                 |                     |                   |                             |                             |           |     |
|-------------------------------|-----------------|---------------------|-------------------|-----------------------------|-----------------------------|-----------|-----|
| SERCA1a(B6CAM1)               | D D N F S T I V | A A V E Q K A I     | V N N M K Q I R   | L I S S N V G E V V         | V C I L T A A L G L P       | E A L I P | 789 |
| PMCA1(Q00804)                 | D D N F T S I V | A A V M G R N V     | D S I S K L Q     | L T V N V V A V I V A       | T G A C I T Q D S P L K A   |           | 884 |
| P37367(Synechocystis sp.)     | D D N F A S I E | A A V E Q R T V     | Q N L R K K A I   | M L L P V N G G E S M T I   | V L S V L L A I N L P I L S |           | 730 |
| Q5FB0(Lactobacillus acid)     | D D N F A T I T | A A V A M G R T V   | E N I K N A I M   | L L S G N L S A I I T V L   | E S I G G S V P F A         |           | 706 |
| Q9CFU9(Lactococcus lactis)    | D D N F V S I V | A A V S I G V V L   | D N I K A S P S   | L S G N L G A I A I V       | A V A V G V M P R T A       |           | 706 |
| Q39V79(Geobacter metallire)   | D D N F A T I V | A A V E G R R I     | V A N I L K E I   | I S I T S N A G T L V A I T | L A P F G L P L P L P       |           | 700 |
| Q74CJ5(Geobacter_sulfured)    | D D N F A T I V | A A V E G R R I     | V A N I L K E I   | T S I T S N I G T L V A I T | L A P F G L P L P L P       |           | 698 |
| C1FN16(Clostridium_botulinum) | D D N F A T I V | A A V S I S N G R I | V A N I L K N S I | K L L S G N T S G I L A V L | S S L S A L P V P F A A     |           | 698 |
| LMCA1(Q8Y9Q5)                 | D D N F V S I V | A A V G V G R T V   | E N I K R S I A   | L E A G N L G A I I A I L   | A L V L D V I N P P F A     |           | 709 |

**TM6**      **TM7**

|                               |                     |                               |                                 |                           |     |
|-------------------------------|---------------------|-------------------------------|---------------------------------|---------------------------|-----|
| SERCA1a(B6CAM1)               | V Q L L W V N L V T | G L P A T A L G E N P P       | D L I M D R P P S P K E P L I S | G L L E E R Y M A I G G   | 842 |
| PMCA1(Q00804)                 | V Q M L W V N L I M | T L A S L A L A T E P P T     | S L L L G K P Y G R N K P L I S | R T M M K N I L G H A     | 937 |
| P37367(Synechocystis sp.)     | L Q V L W L N M I M | S I T M T V P L A E E A G S P | G I M Q Q A P R N P N E P L I T | K L L L H R I L L V S L   | 783 |
| Q5FB0(Lactobacillus acid)     | V Q L L F I N L V T | S P A I A I G M E P G A P     | V L D S P P P K P V G I G       | R N L V T K I T L Q G I   | 759 |
| Q9CFU9(Lactococcus lactis)    | V Q L L F I N L V M | S P A I A I G M E K A P       | V L M R A P K Q L N E G I       | A N G M R V I L I R G S   | 759 |
| Q39V79(Geobacter metallire)   | I Q I L W L N L L C | S L P G L A L A G E P A E R   | V M R P P V D P K R E G I S     | A G G G F V L G Y G E     | 753 |
| Q74CJ5(Geobacter_sulfured)    | I Q I L W L N L L C | S L P G L A L A G E P A E R   | V M S R P P V D P K R E G V     | A G G G F Y A A G Y G L   | 751 |
| C1FN16(Clostridium_botulinum) | V H L L F I N L L T | S L P A I A I G M E K S T R   | V V L N E K P P D S K E S I     | N G G V S I L V F G E     | 751 |
| LMCA1(Q8Y9Q5)                 | L Q L L F I N L L E | S L P A I A I G M E K A P     | V M R R K P R I N E G I         | A G G T M R A V I S R G V | 762 |

|                               |                               |                                   |                     |                                 |     |
|-------------------------------|-------------------------------|-----------------------------------|---------------------|---------------------------------|-----|
| SERCA1a(B6CAM1)               | V V G A A T V G A A A M V E M | A E D G P G V T                   | H Q L T H F M Q C T | E D H P H E G L D C H I E A P E | 895 |
| PMCA1(Q00804)                 | V Q L V V V T L L L A G E K   | E D I D S G R N A P L H A P P S E |                     |                                 | 970 |
| P37367(Synechocystis sp.)     | L N N I L I G M               | E M V N R T D D L A               |                     |                                 | 805 |
| Q5FB0(Lactobacillus acid)     | I I S V G V I T A M I         | G R N T S P A V                   |                     |                                 | 779 |
| Q9CFU9(Lactococcus lactis)    | L I G I A A I I S Q           | V G Q K T S P E M G               |                     |                                 | 780 |
| Q39V79(Geobacter metallire)   | L I G A V A L A Q A           | A L R K G L P W                   |                     |                                 | 773 |
| Q74CJ5(Geobacter_sulfured)    | V I G A A A L A Q A           | A L R M L P W                     |                     |                                 | 771 |
| C1FN16(Clostridium_botulinum) | L I A I A T I T A             | H I G L S S G P V G T             |                     |                                 | 772 |
| LMCA1(Q8Y9Q5)                 | L I G I A V I I S Q           | I G M Q I S P E M S               |                     |                                 | 783 |

**TMS**      **TM9**

|                               |                           |                             |                     |                                     |      |
|-------------------------------|---------------------------|-----------------------------|---------------------|-------------------------------------|------|
| SERCA1a(B6CAM1)               | P M T M A L S V L V T I   | E M C N A L N S L -         | S E N O S L - - - - | M M P P V V N I W L L G S I C L S   | 940  |
| PMCA1(Q00804)                 | H V T I V N I V L M Q L   | E N I N A R K I H G E R N V |                     | E G I N N A I C T I V L G T         | 1066 |
| P37367(Synechocystis sp.)     | A T M A I Q A L A A A V I | L L S I S - - -             | L G S L G V I T G   | R Q T T R A S I L L L G I A V A     | 856  |
| Q5FB0(Lactobacillus acid)     | A C T M A E S T L T A     | L L H G F N C R -           | S Q E S T - - - -   | K R I G E K M N M P S L A A A V G   | 823  |
| Q9CFU9(Lactococcus lactis)    | - V A M A F T T L I L A   | T L Q T A A R - - -         | S Q S Q N I - - - - | L K L G T T N K V L M A V T C       | 824  |
| Q39V79(Geobacter metallire)   | - Q T M V F T L V L N R   | M A V L S V R - -           | S D R Q S L - - - - | R I G L L S N L P L C G A I V I T   | 817  |
| Q74CJ5(Geobacter_sulfured)    | - Q T M V F T L V L N R   | M A V L S V R - -           | S D R T S L - - - - | L R I G I M S N E P L V G A I V I T | 815  |
| C1FN16(Clostridium_botulinum) | A S T M A P A T L C I G   | L H G F N C R -             | G V K S I - - - -   | A L G L S N R S W I A A G I G       | 816  |
| LMCA1(Q8Y9Q5)                 | - V A M A F T T L I L A   | T L Q T A A R - -           | S N V Q T A - - - - | G A G E S N R S W I G A V L L C     | 827  |

**TM10**

|                               |                                     |                                                 |                                       |      |
|-------------------------------|-------------------------------------|-------------------------------------------------|---------------------------------------|------|
| SERCA1a(B6CAM1)               | M S L H L I L I V D P L P M I       | K L - K A L E L T O W L M V L K I               | S L P V I G L D E I L K K I A - - -   | 988  |
| PMCA1(Q00804)                 | E V V Q I I I V Q A G K P -         | S S C - S E L S V E Q W L M S I                 | L G M G T L L G Q L I S T I P T S R L | 1066 |
| P37367(Synechocystis sp.)     | L A L Q I G S L P M N V L P E T     | A P M E W Q Q A I C L L P M I                   | P M V P V A I L A N R L D P - - -     | 905  |
| Q5FB0(Lactobacillus acid)     | T L L L A L I L W P A L H V L A V I | T P L P N S D M L L L A L M P T I               | L I Q I W I A N - - - -               | 871  |
| Q9CFU9(Lactococcus lactis)    | L A L S L T T - L P N L R E I       | S I P A A L G S Q M I V A A G L A V I           | A V I C M E I L K S I K - - -         | 872  |
| Q39V79(Geobacter metallire)   | L L Q L M V V T P L L N P I F S T   | - A P L S G A L L I T V G L A V G M I           | L V S L H K V L K - - - -             | 865  |
| Q74CJ5(Geobacter_sulfured)    | L C L Q L A V V T P A L N P L F H T | - E P L S G A L V A T V V L A M G M V L S       | L O Q V L I - - - -                   | 863  |
| C1FN16(Clostridium_botulinum) | L L L L N A V L L V P P L Q S L     | F H V I P L S G A N I G H I L L A               | L M P T L I Q I K V I K - - -         | 864  |
| LMCA1(Q8Y9Q5)                 | L V L G I T V L P G A K E I         | S I P A S G L H R S T I A A G L A L A A V V M M | E I I K V V Q - - - -                 | 875  |

**Calmodulin-binding domain**

|                               |                               |                                     |                                       |      |
|-------------------------------|-------------------------------|-------------------------------------|---------------------------------------|------|
| SERCA1a(B6CAM1)               | K F Q R E V V H G T Q K R E I | G E E P L A E D V E S I V H A E R P | R R S W O I F V R G F N R I O T O M I | 988  |
| PMCA1(Q00804)                 | - - - - -                     | - - - - -                           | - - - - -                             | 1119 |
| P37367(Synechocystis sp.)     | - - - - -                     | - - - - -                           | - - - - -                             | 905  |
| Q5FB0(Lactobacillus acid)     | - - - - -                     | - - - - -                           | - - - - -                             | 871  |
| Q9CFU9(Lactococcus lactis)    | - - - - -                     | - - - - -                           | - - - - -                             | 872  |
| Q39V79(Geobacter metallire)   | - - - - -                     | - - - - -                           | - - - - -                             | 865  |
| Q74CJ5(Geobacter_sulfured)    | - - - - -                     | - - - - -                           | - - - - -                             | 863  |
| C1FN16(Clostridium_botulinum) | - - - - -                     | - - - - -                           | - - - - -                             | 864  |
| LMCA1(Q8Y9Q5)                 | - - - - -                     | - - - - -                           | - - - - -                             | 875  |

|                               |                     |                           |                           |                             |      |
|-------------------------------|---------------------|---------------------------|---------------------------|-----------------------------|------|
| SERCA1a(B6CAM1)               | V V N A Q S R S S I | Q G A L R R Q P I S I A S | Q H H I R V V N A R S S L | V E G L E R P S K S S I H N | 988  |
| PMCA1(Q00804)                 | - - - - -           | - - - - -                 | - - - - -                 | - - - - -                   | 1172 |
| P37367(Synechocystis sp.)     | - - - - -           | - - - - -                 | - - - - -                 | - - - - -                   | 905  |
| Q5FB0(Lactobacillus acid)     | - - - - -           | - - - - -                 | - - - - -                 | - - - - -                   | 871  |
| Q9CFU9(Lactococcus lactis)    | - - - - -           | - - - - -                 | - - - - -                 | - - - - -                   | 872  |
| Q39V79(Geobacter metallire)   | - - - - -           | - - - - -                 | - - - - -                 | - - - - -                   | 865  |
| Q74CJ5(Geobacter_sulfured)    | - - - - -           | - - - - -                 | - - - - -                 | - - - - -                   | 863  |
| C1FN16(Clostridium_botulinum) | - - - - -           | - - - - -                 | - - - - -                 | - - - - -                   | 864  |
| LMCA1(Q8Y9Q5)                 | - - - - -           | - - - - -                 | - - - - -                 | - - - - -                   | 875  |

|                               |                                                                                              |      |
|-------------------------------|----------------------------------------------------------------------------------------------|------|
| SERCA1a(B6CAM1)               | - - - - - R N L L G - - - - -                                                                | 994  |
| PMCA1(Q00804)                 | MT H P E R I E S P H I P L I D D T A E D D A P T K R N S S P P P S P N K N N L V D S G I H L | 1225 |
| P37367(Synechocystis_sp.)     | - - - - - R K F - - - - -                                                                    | 905  |
| Q5FJB0(Lactobacillus_acid)    | - - - - - G V P S K H - - - - -                                                              | 875  |
| Q9CFU9(Lactococcus_lactis)    | - - - - - R I Q P F S - - - - -                                                              | 878  |
| Q39V79(Geobacter_metalired.)  | - - - - - R W R I G S S R - - - - -                                                          | 871  |
| Q74CJ5(Geobacter_sulfurred.)  | - - - - - R S E K A D I N F E N K G G K V K E K Q V A - - - - -                              | 871  |
| C1FN16(Clostridium_botulinum) | - - - - - N K - - - - -                                                                      | 889  |
| LMCA1(Q8Y8Q5)                 | - - - - -                                                                                    | 880  |

|                               |                                                 |      |
|-------------------------------|-------------------------------------------------|------|
| SERCA1a(B6CAM1)               | - - - - -                                       | 994  |
| PMCA1(Q00804)                 | T I E M N K S A T S S S F G S P L H S L E T S L | 1249 |
| P37367(Synechocystis_sp.)     | - - - - -                                       | 905  |
| Q5FJB0(Lactobacillus_acid)    | - - - - -                                       | 875  |
| Q9CFU9(Lactococcus_lactis)    | - - - - -                                       | 878  |
| Q39V79(Geobacter_metalired.)  | - - - - -                                       | 871  |
| Q74CJ5(Geobacter_sulfurred.)  | - - - - -                                       | 871  |
| C1FN16(Clostridium_botulinum) | - - - - -                                       | 889  |
| LMCA1(Q8Y8Q5)                 | - - - - -                                       | 880  |

Figure S1: Multiple sequence alignment selected  $\text{Ca}^{2+}$  ATPases from rabbit and eubacteria generated by aligning 52 sequences of type IIa and IIb P-type ATPases in MUSCLE(1). The following amino acid groupings are indicated by colour schemes: positively charged (RK) shown on blue background; polar (QN) shown in purple; hydrophobic (CLIVM) with gray background; aromatic (FWY) with green background; small (TS) with a white background and tiny (AG) with yellow background. The dephosphorylation motif (TGES), phosphorylation motif (DKTGT), nucleotide binding motif (KGA), hinge motif (GDGXND) and calmodulin binding domain are highlighted in boxes. The residues involved in binding  $\text{Ca}^{2+}$  at site I and II are marked by black arrowheads. The structural elements of the transmembrane helices of SERCA1a (PDB: 1T5T) (2) are depicted in gray above the alignment.

Figure S2

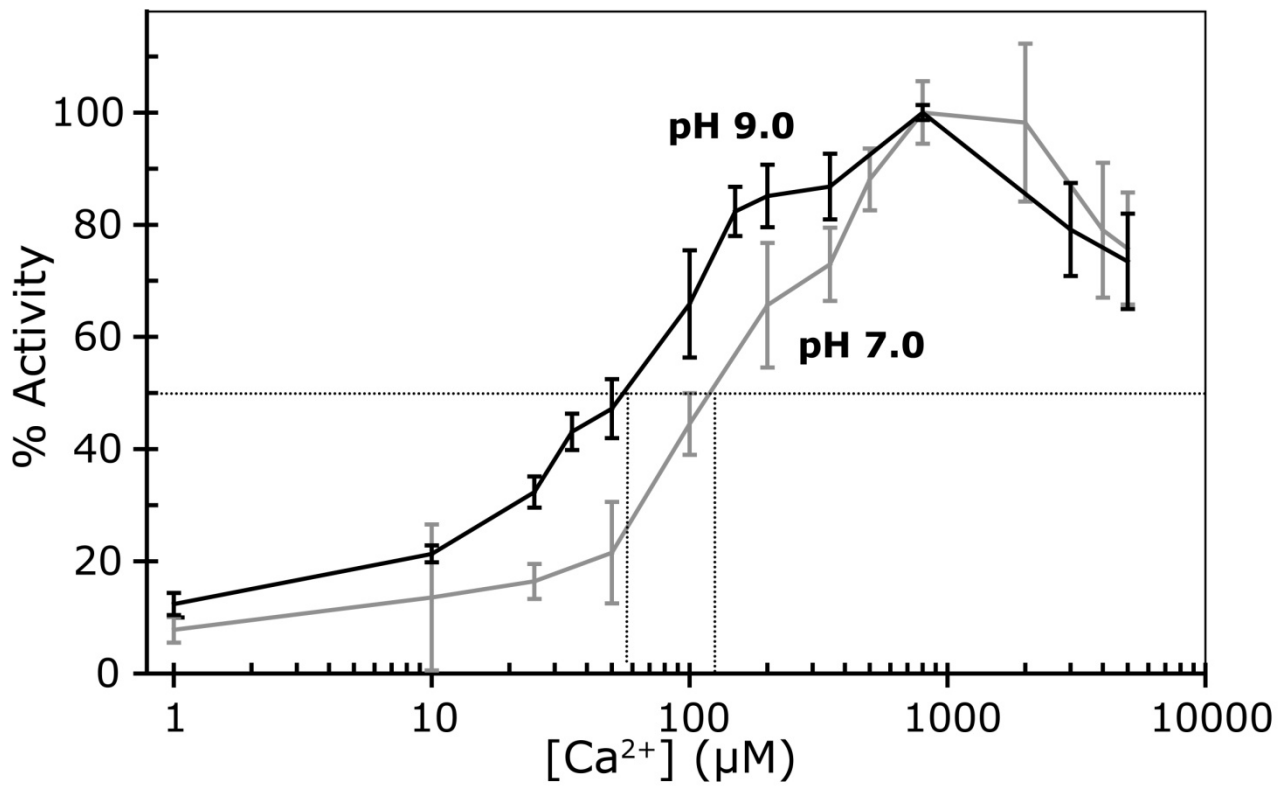

Figure S2. The ATPase activity of LMCA1 measured as a function of Ca<sup>2+</sup>-concentration at pH 7 (grey line) and 9 (black line).

1. Edgar, R. C. (2004) *Nucl Acids Res* **32**, 1792-1797
2. Sorensen, T. L., Moller, J. V., and Nissen, P. (2004) *Science* **304**, 1672-1675
